# Supplementary material for: Tuning and assessment of the HYCOM-NORWECOM V2.1 biogeochemical modeling system for the North Atlantic and Arctic oceans
Source: Copernicus journal article supplement (doi:10.5194/gmd-8-2187-2015), 2015-07-20
Supplement: Supplementary file 4 [file gmd-8-2187-2015-supplement.zip]

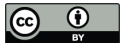

## *Supplement of*

# **Tuning and assessment of the HYCOM-NORWECOM V2.1 biogeochemical modeling system for the North Atlantic and Arctic oceans**

**A. Samuelsen et al.**

*Correspondence to:* A. Samuelsen (annette.samuelsen@nersc.no)

- gmd-8-2187-2015-supplement-cover-letter.pdf
- Supplementary material
  - .DS\_Store
  - Supp\_june\_2015\_v1.pdf
  - userguide2\_0.pdf
- \_\_MACOSX
  - .\_Supplementary material
  - Supplementary material
    - \* .\_DS\_Store
    - \* .\_Supp\_june\_2015\_v1.pdf
    - \* .\_userguide2\_0.pdf

The copyright of individual parts of the supplement might differ from the CC-BY 3.0 licence.
